# Supplementary material for: Modeling PAH Mixture Interactions in a Human In Vitro Organotypic Respiratory Model
Source: MDPI journal article supplement (doi:10.3390/ijms25084326), 2024-04-13
Supplement: s1 [file s1]

## **Supporting Information for Modeling PAH mixture interactions in a human in vitro 3D respiratory culture system**

Victoria Colvin <sup>1,2</sup>, Lisa M. Bramer <sup>2,3</sup>, Brianna N. Rivera <sup>1,2</sup>, Jamie M. Pennington <sup>1</sup>, Katrina M. Waters <sup>2,3</sup>  
and Susan C. Tilton <sup>1,2</sup>

- 1 Department of Environmental and Molecular Toxicology, Oregon State University, Corvallis, OR, USA; [susan.tilton@oregonstate.edu](mailto:susan.tilton@oregonstate.edu) (S.C.T.)
- 2 OSU/PNNL Superfund Research Program, Oregon State University, Corvallis, OR, USA
- 3 Pacific Northwest National Laboratory, Richland, WA, USA

Table of Contents:

| <b>Tables:</b>                                                                         | <b>Page Number</b> |
|----------------------------------------------------------------------------------------|--------------------|
| S1: CAS#, purity, and supplier for compounds used to make AbundMix and ToxMix.         | 3                  |
| S2a: Component concentrations in AbundMix exposure solutions in a DPBS with 1% DMSO... | 3                  |
| S2b: Component concentrations in ToxMix exposure solutions in a DPBS with 1% DMSO...   | 3                  |
| S3: Forward and reverse primer sequences used for RT-qPCR.                             | 4                  |
| <b>Figures:</b>                                                                        | <b>Page Number</b> |
| S1: Cytotoxicity and barrier integrity from PAH mixture and component exposures as...  | 5                  |

**Table S1.** CAS#, purity, and supplier for compounds used to make AbundMix and ToxMix.

| Compound            | CAS#     | Purity | Supplier                    |
|---------------------|----------|--------|-----------------------------|
| Naphthalene         | 91-20-3  | 99%    | Sigma Aldrich               |
| Acenaphthene        | 83-32-9  | 100%   | AccuStandard                |
| 2-methylnaphthalene | 91-57-6  | 98.4%  | AccuStandard                |
| 1-methylnaphthalene | 90-12-0  | 99.6%  | AccuStandard                |
| Fluorene            | 86-73-7  | 98.1%  | AccuStandard                |
| phenanthrene        | 85-01-8  | 99.5%  | AccuStandard                |
| Retene              | 483-65-8 | 97%    | Santa Cruz<br>Biotechnology |
| Benzo[a]fluorene    | 238-84-6 | >98%   | Santa Cruz<br>Biotechnology |
| Benzo[b]fluorene    | 243-17-4 | 98.1%  | AccuStandard                |
| Benzo[c]fluorene    | 205-12-9 | 98%    | TRC                         |
| Triphenylene        | 217-59-4 | 99.4%  | AccuStandard                |
| Benzo[e]pyrene      | 192-97-2 | 99.9%  | AccuStandard                |
| Benzo[ghi]perylene  | 191-24-2 | 98.9%  | AccuStandard                |

**Table S2a.** Component concentrations in AbundMix exposure solutions in a DPBS with 1% DMSO vehicle.

|                     | Concentration (μM) |       |       |
|---------------------|--------------------|-------|-------|
| Compound or Mixture | 75%                | 50%   | 10%   |
| Naphthalene         | 585.2              | 390.1 | 78    |
| Acenaphthene        | 243.2              | 162.1 | 32.4  |
| 2-methylnaphthalene | 211                | 140.6 | 28.1  |
| 1-methylnaphthalene | 158.2              | 105.5 | 21.1  |
| Fluorene            | 90.2               | 60.2  | 12    |
| phenanthrene        | 42.1               | 28.1  | 5.6   |
|                     |                    |       |       |
| AbundMix            | 1329.9             | 886.6 | 177.2 |

**Table S2b.** Component concentrations in ToxMix exposure solutions in a DPBS with 1% DMSO vehicle.

|                     | Concentration (μM) |       |      |      |       |
|---------------------|--------------------|-------|------|------|-------|
| Compound or Mixture | 25%                | 10%   | 5%   | 1%   | 0.5%  |
| Retene              | 202.5              | 81.4  | 40.7 | 8.1  | 4     |
| Benzo[a]fluorene    | 50                 | 20    | 10   | 2    | 1     |
| Benzo[b]fluorene    | 25                 | 10    | 5    | 1    | 0.5   |
| Benzo[c]fluorene    | 12.5               | 5     | 2.5  | 0.5  | 0.25  |
| Triphenylene        | 5                  | 2     | 1    | 0.2  | 0.1   |
| Benzo[e]pyrene      | 0.5                | 0.2   | 0.1  | 0.02 | 0.01  |
| Benzo[ghi]perylene  | 0.25               | 0.1   | 0.1  | 0.01 | 0.005 |
|                     |                    |       |      |      |       |
| ToxMix              | 297.5              | 118.7 | 59.4 | 11.9 | 5.9   |

**Table S3.** Forward and reverse primer sequences used for RT-qPCR.

| Gene    | Direction | Sequence                  |
|---------|-----------|---------------------------|
| PPIA    | F         | GCATACGGGTCCTGGCATCTTGTCC |
| PPIA    | R         | ATGGTGATCTTCTTGCTGGTCTTGC |
| CYP1A1  | F         | TCGGCCACGGAGTTTCTTC       |
| CYP1A1  | R         | GGTCAGCATGTGCCCAATCA      |
| CYP1B1  | F         | CCAACCTGCCCTATGTCCT       |
| CYP1B1  | R         | CTGGATCAAAGTTCTCCGGG      |
| ALDH3A1 | F         | TGTTCTCCAGCAACGACAA       |
| ALDH3A1 | R         | AGGGCAGAGAGTGCAAGG        |
| GSTA    | F         | CTGCCCCGTATGTCCACCTG      |
| GSTA    | R         | AGCTCCTCGACGTAGTAGAGA     |
| HMOX1   | F         | CTCTGAAGTTTAGGCCATTG      |
| HMOX1   | R         | AGTTGCTGTAGGGCTTTATG      |
| NQO1    | F         | GGAGAGCACTGATCGTACTGGC    |
| NQO1    | R         | GGATACTGAAAGTTTCGCAGGG    |
| GJA1    | F         | TGGTAAGGTGAAAATGCGAGG     |
| GJA1    | R         | GCACTCAAGCTGAATCCATAGAT   |
| TJP2    | F         | GGCCTACGACCCAGACTAC       |
| TJP2    | R         | ACTCTTCGTTTCGCTCTGCTTT    |
| DDB2    | F         | ACCTCCGAGATTGTATTACGCC    |
| DDB2    | R         | TCACATCTTCTGCTAGCACCG     |

(previously reported in Chang, Y., Siddens, L. K., Heine, L. K., Sampson, D. A., Yu, Z., Fischer, K. A., Löhr, C. V., & Tilton, S. C. (2019). Comparative mechanisms of PAH toxicity by benzo[a]pyrene and dibenzo[def,p]chrysene in primary human bronchial epithelial cells cultured at air-liquid interface. *Toxicology and Applied Pharmacology*, 379, 114644. <https://doi.org/10.1016/j.taap.2019.114644>)

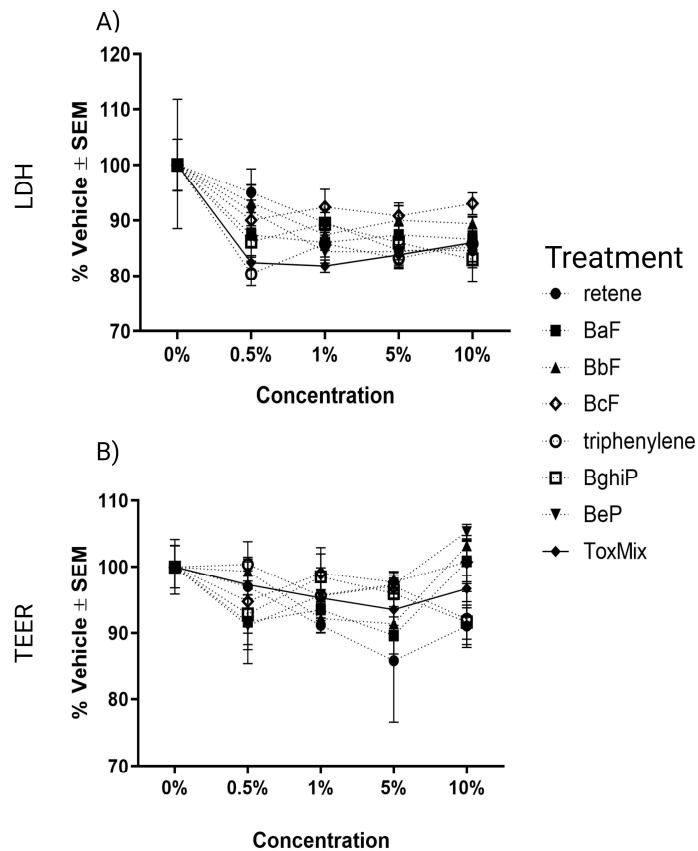

**Figure S1.** Cytotoxicity and barrier integrity from PAH mixture and component exposures as measured by LDH leakage and TEER, respectively. ALI-HBECs (n=4) were apically treated ToxMix, retene, BaF, BbF, BcF, triphenylene, BghiP, or BeP (10%, 5%, 1%, or 0.5%) for 24 hours in a DPBS with 1% DMSO vehicle. A) LDH leakage after ToxMix or component exposure B) TEER after ToxMix or component exposure. Data points represent the average % change normalized to the vehicle control. Error bars represent the standard error of the means. Significance was evaluated using a one-way ANOVA with Dunnett's post-hoc test compared to the vehicle control. Created with BioRender.com.
